# Supplementary material for: Impact of millennial-scale oceanic variability on the Greenland ice sheet evolution throughout the Last Glacial Period
Source: Copernicus journal article supplement (doi:10.5194/cp-2018-129), 2018-10-09
Supplement: Supplementary file 1 [file cp-2018-129-supplement.zip]

## SUPPLEMENTARY MATERIAL

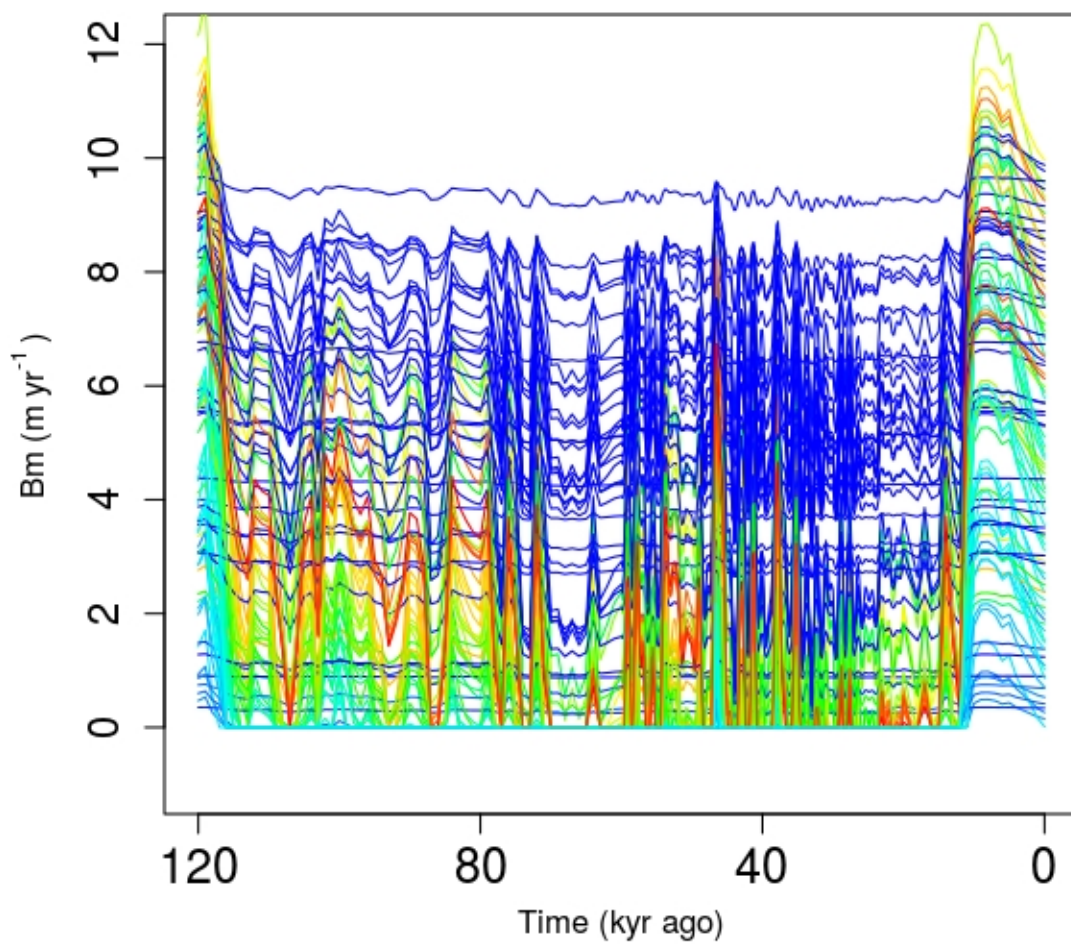

**Fig. SM1** Ensemble of basal melting rate evolutions for the 100 LE simulations throughout the last glacial period. Color scale refers to the colored legend of Fig. 3.

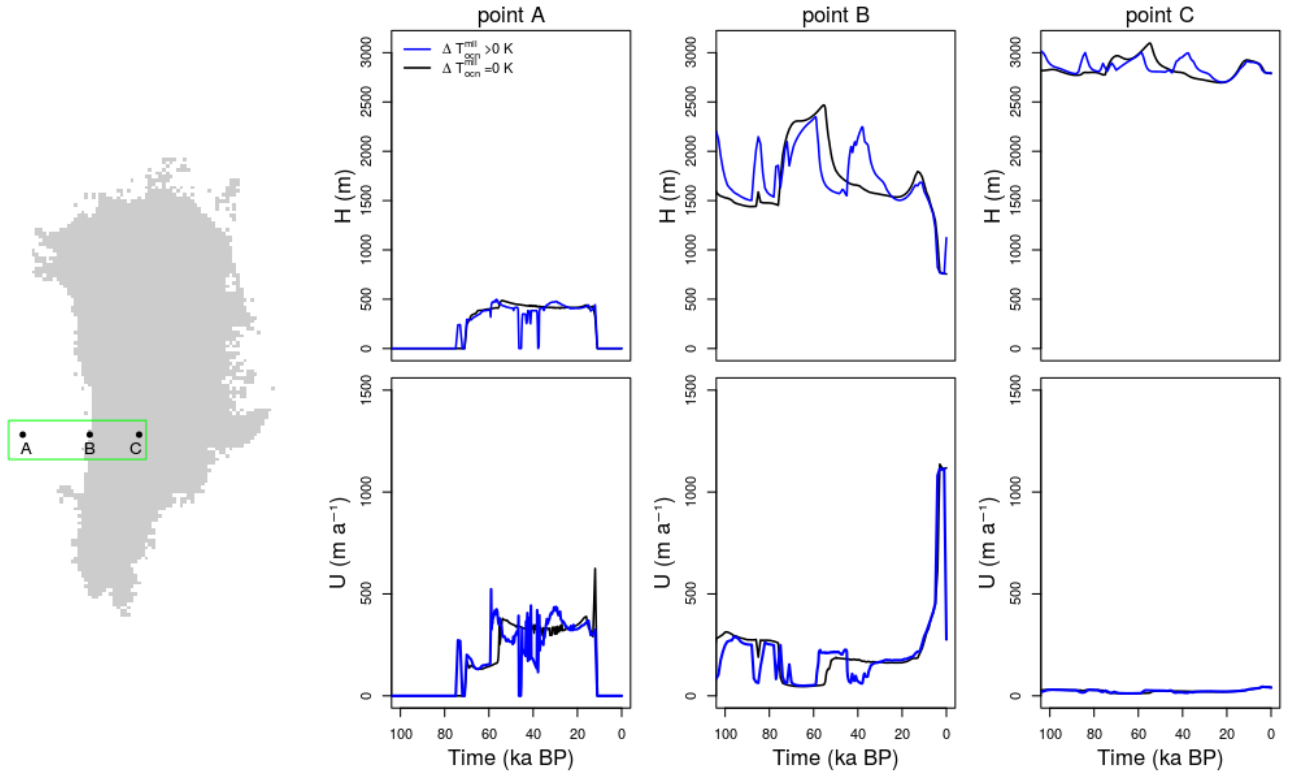

**Fig. SM2** Transient dynamics specified for three locations along Jakobshavn Isbrae outlet glacier. Ice thickness (upper panels) and velocity (lower panels) LGP evolution is shown for the glacial marine margin (point A), present-day marine margin (point B) and far in the interior of the ice sheet (point C). Black curves indicate the dynamics of the ORB<sub>max</sub> simulation, blue curves represent the dynamics of the TOT<sub>max</sub> simulation.

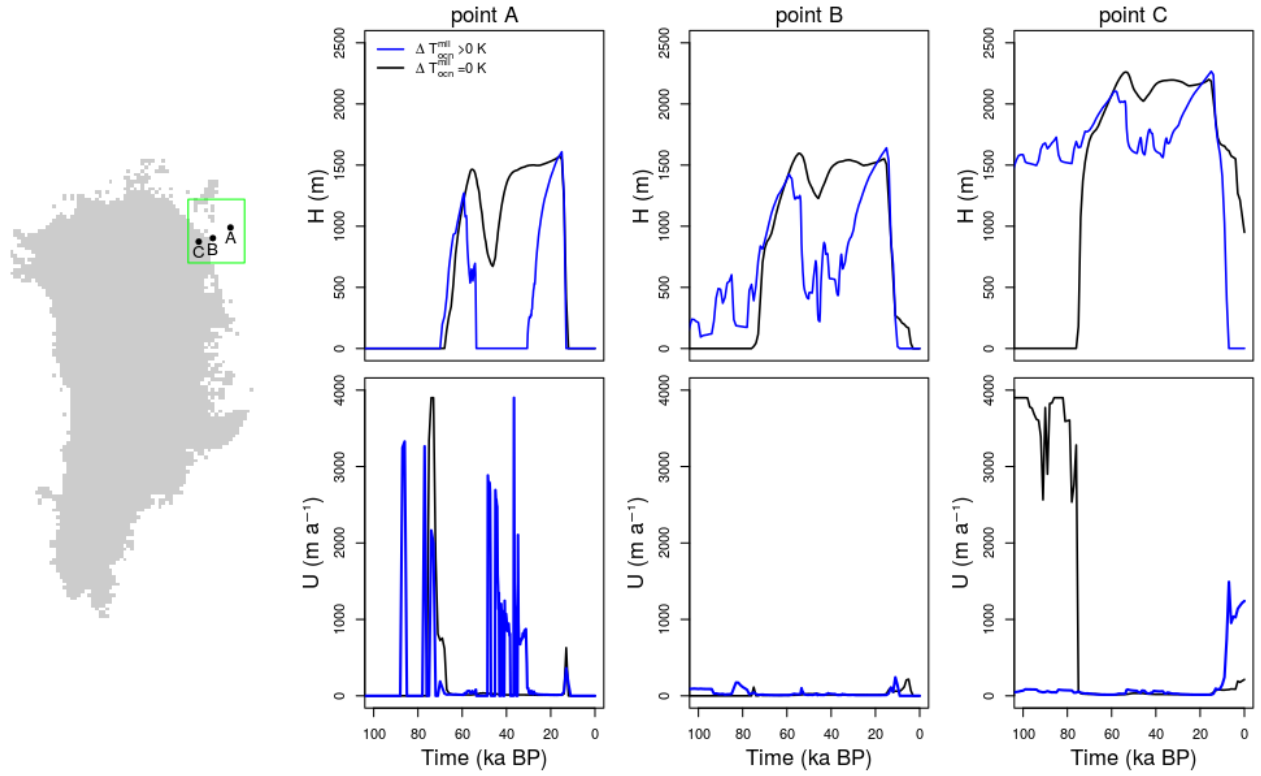

**Fig. SM3** Transient dynamics specified for three locations along NEGIS area. Ice thickness (upper panels) and velocity (lower panels) LGP evolution is shown for the glacial marine margin (point A), present-day marine margin (point B) and far in the interior of the ice sheet (point C). Black curves indicate the dynamics of the  $\text{ORB}_{\text{max}}$  simulation, blue curves represent the dynamics of the  $\text{TOT}_{\text{max}}$  simulation.
